# Supplementary material for: Facile synthesis of the SnTe/SnSe binary nanocomposite via a hydrothermal route for flexible solid-state supercapacitors
Source: Royal Society of Chemistry journal article supplement (doi:10.1039/d3ra01028g), 2023-01-01
Supplement: d3ra01028g1.pdf [file d3ra01028g1.pdf]

**Supporting document for**

**Facile synthesis of SnTe/SnSe binary nanocomposite via hydrothermal route for flexible solid state supercapacitor**

Muhammad Abdullah<sup>[a]</sup>, Peter John<sup>[a,\*]</sup>, Khaled Fahmi Fawy<sup>[b]</sup>, Sumaira Manzoor<sup>[c]</sup>, Kashif Younas Butt<sup>[d]</sup>, Abdul Ghafoor Abid<sup>[c]</sup>, Mouslim Messali<sup>[e]</sup>, Muhammad Najam-Ul-Haq<sup>[c]</sup>, Muhammad Naeem Ashiq<sup>[c,\*]</sup>

<sup>[a]</sup> Department of Chemistry, Government College University, Lahore, Pakistan

<sup>[b]</sup> Department of Chemistry, Faculty of Science, King Khalid University, P.O. Box 9004, Abha 61413, Saudi Arabia.

<sup>[c]</sup> Institute of Chemical Sciences, Bahauddin Zakariya University, Multan-60800, Pakistan.

<sup>[d]</sup> Department of Chemistry, University of Lahore, Lahore, Pakistan.

<sup>[e]</sup> Department of Chemistry, College of Science, Imam Mohammad Ibn Saud Islamic University, P.O. Box, 90950, Riyadh 11623, Saudi Arabia

\*= Corresponding Author

E-mail: [naeembzu@bzu.edu.pk](mailto:naeembzu@bzu.edu.pk)

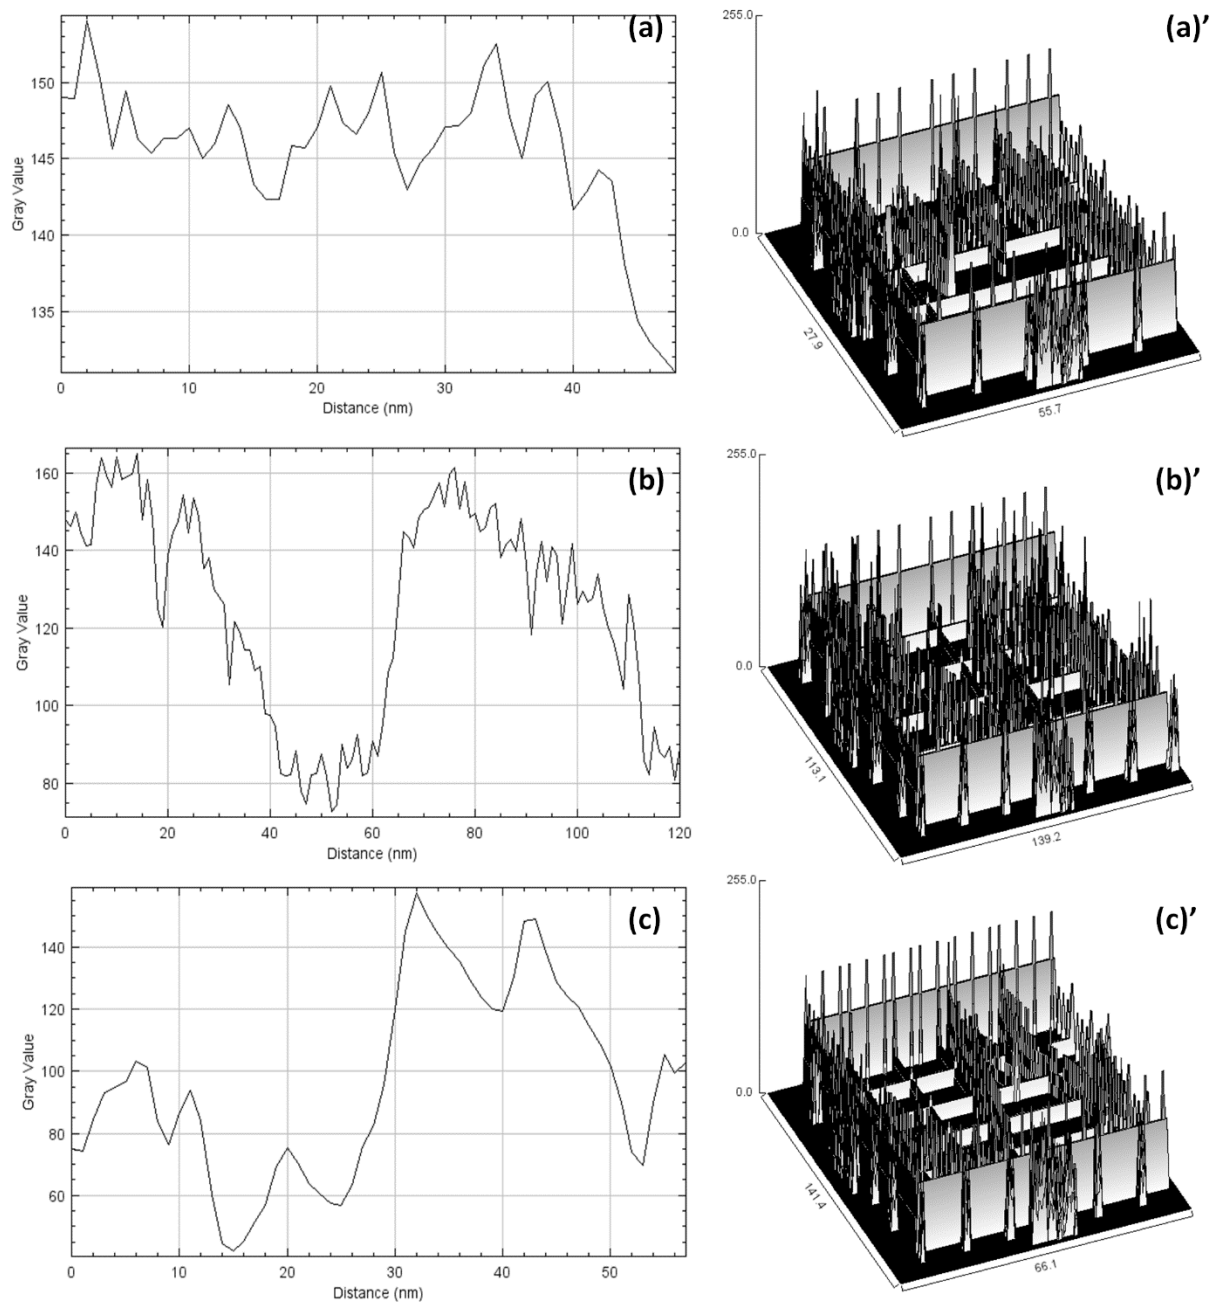

**Figure S1:** SEM analysis of plot profile of (a) SnTe, (b) SnSe, (c) SnTe/SnSe nanostructure and surface plot of (a)' SnTe, (b)' SnSe and (c)' SnTe/SnSe nanostructure
